# Supplementary material
Source: Elsevier journal article supplement (http://library.osu.edu/projects/msa/suppmat/v256.i1.pp91-98/mmc3.pdf)
Supplement: mmc3 [file mmc3.pdf]

Table 3: Asymmetry doubling coefficients for states of  $A$  symmetry of the CO-stretch mode.

| $v$ | $v_z$ | $K$ | $S$                            | $T$                         | $U$                         | $V$                       | $W$                         |
|-----|-------|-----|--------------------------------|-----------------------------|-----------------------------|---------------------------|-----------------------------|
| co  | 0     | 1   | $-1.29355(37) \times 10^{-02}$ | $1.32(20) \times 10^{-07}$  | $6.55(36) \times 10^{-10}$  | $1.5(27) \times 10^{-14}$ | $-4.40(69) \times 10^{-17}$ |
| co  | 0     | 2   | $2.649(28) \times 10^{-06}$    | $-1.43(52) \times 10^{-10}$ | $-1.71(24) \times 10^{-13}$ |                           |                             |
| co  | 0     | 3   | $-3.62(41) \times 10^{-10}$    | $-6.09(76) \times 10^{-13}$ | $3.22(34) \times 10^{-16}$  |                           |                             |
| co  | 0     | 4   | $5.65(26) \times 10^{-14}$     | $-7.0(19) \times 10^{-18}$  |                             |                           |                             |
| co  | 1     | 1   | $-1.3439(11) \times 10^{-03}$  | $3.88(26) \times 10^{-08}$  | $1.02(15) \times 10^{-11}$  |                           |                             |
| co  | 1     | 2   | $-1.9812(100) \times 10^{-07}$ | $7.93(93) \times 10^{-12}$  |                             |                           |                             |
| co  | 1     | 4   | $1.400(93) \times 10^{-13}$    | $-2.37(20) \times 10^{-16}$ | $1.09(10) \times 10^{-19}$  |                           |                             |
